# Supplementary material for: Size-Controllable Prussian Blue Nanoparticles Using Pluronic Series for Improved Antioxidant Activity and Anti-Inflammatory Efficacy
Source: MDPI journal article supplement (doi:10.3390/antiox11122392), 2022-12-02
Supplement: s1 [file s1]

# **Supporting Information**

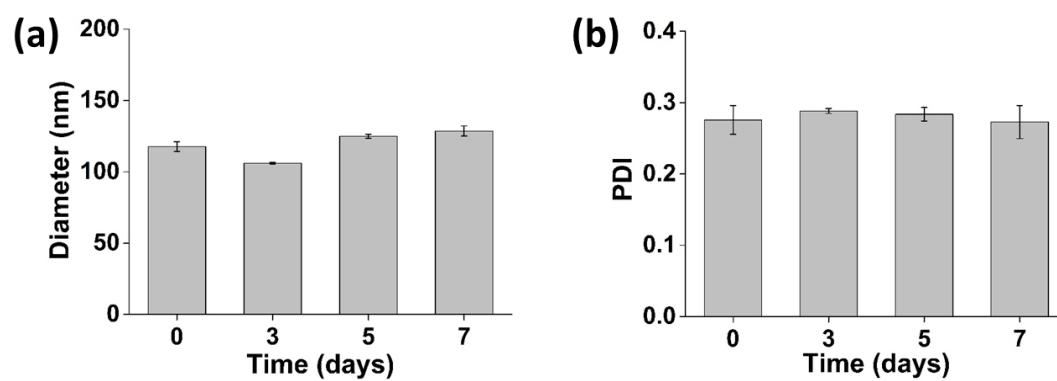

**Figure S1.** Stability analysis of PB/PP123 NP in a biological buffer. (a) Hydrodynamic diameter and (b) polydispersity index (PDI) of the NP after a week of storage at 37 °C.

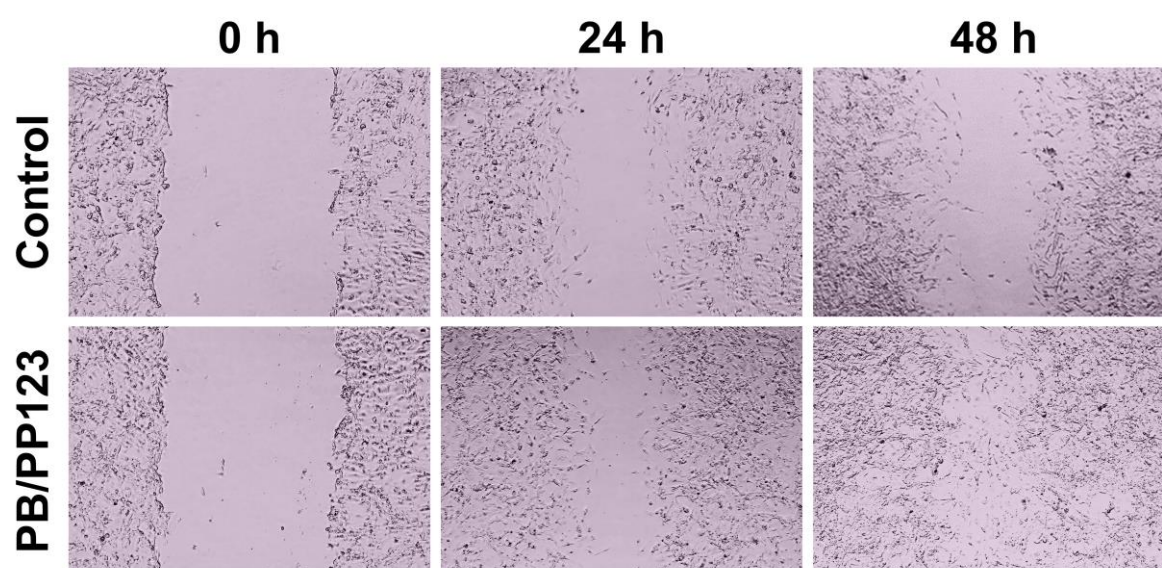

**Figure S2.** In vitro wound-healing efficacy of PB/PP123 NP in FBS-containing cell media without starvation. Wound closure of NIH 3T3 fibroblast cells after 48 h of treatment with NPs at different time points.
